# Supplementary material for: Transition to universal primary health care coverage in Brazil: Analysis of uptake and expansion patterns of Brazil’s Family Health Strategy (1998-2012)
Source: PubMed Central journal article supplement (PMC6086633; doi:10.1371/journal.pone.0201723), 2018-08-10

**S1 Fig. Regional and State Administrative Divisions of Brazil.**

The map shows the boundaries and names of each of the 27 states, and indicates in color the boundaries of the five regions of Brazil.

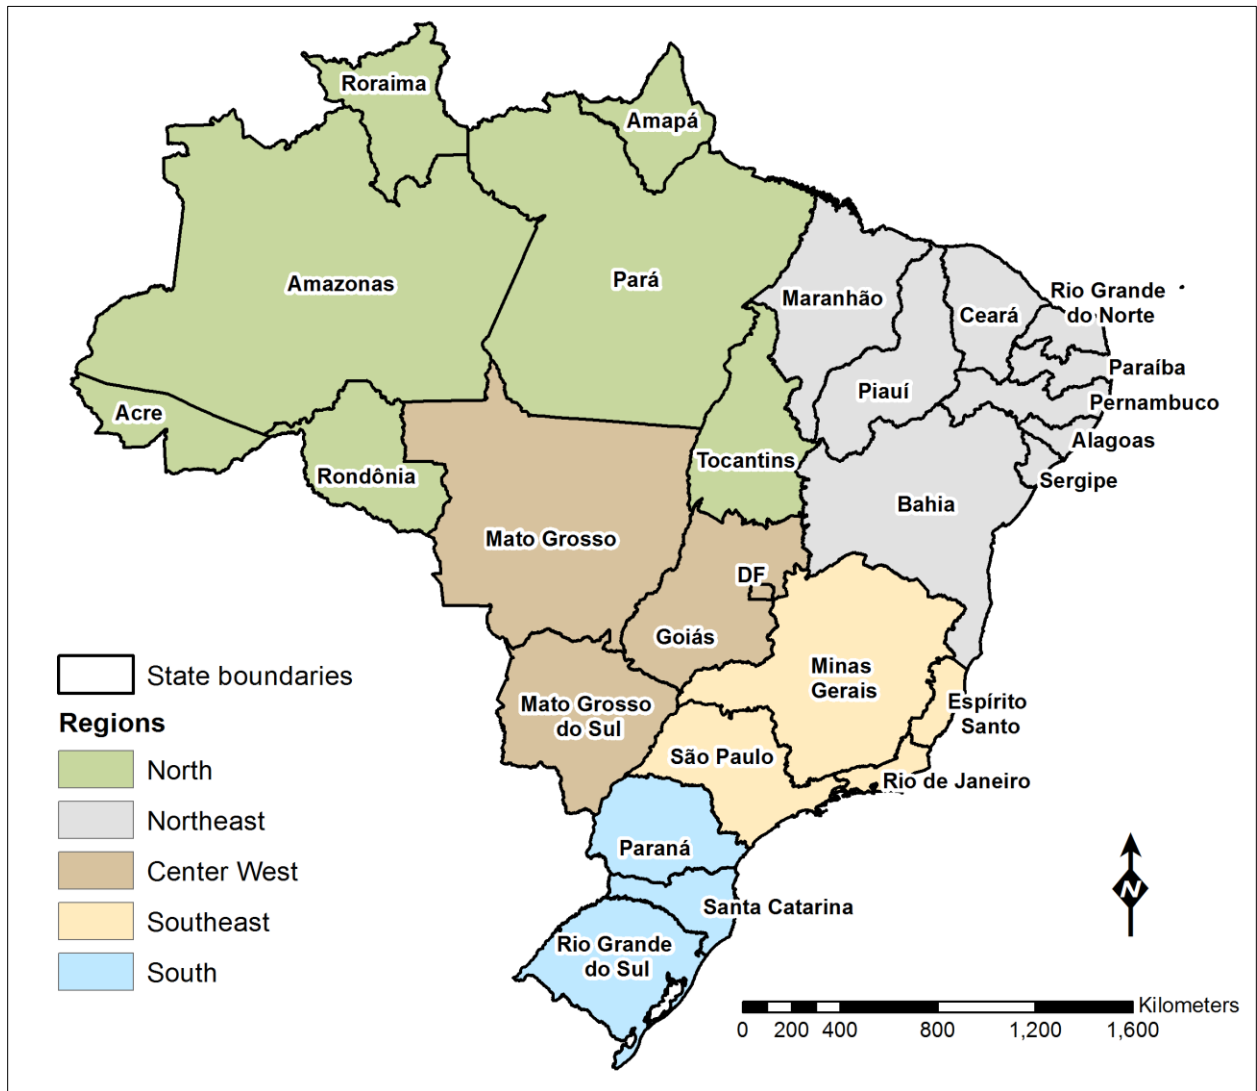

Supplement: pone.0201723.s001.pdf [file pone.0201723.s001.pdf]
