# Supplementary material for: Transition to universal primary health care coverage in Brazil: Analysis of uptake and expansion patterns of Brazil’s Family Health Strategy (1998-2012)
Source: PubMed Central journal article supplement (PMC6086633; doi:10.1371/journal.pone.0201723), 2018-08-10
Supplement: pone.0201723.s002.pdf [file pone.0201723.s002.pdf]

**S1 Table. Percentage distribution of municipalities in each state according to categorization domain.** Each line of the table indicates the percentage of municipalities in the state that match categories of FHS uptake and expansion.

| Regions   | Uptake and Coverage Expansion |       |       |       |       |       |       | Uptake |       | Coverage expansion |       |       |
|-----------|-------------------------------|-------|-------|-------|-------|-------|-------|--------|-------|--------------------|-------|-------|
|           | States                        | EA-US | LG-US | EA-UU | LG-UU | EA-CT | LG-CT | LG     | EA    | US                 | UU    | CT    |
| North     | AC (N=22)                     | 0     | 13.64 | 45.45 | 4.55  | 18.18 | 18.18 | 36.36  | 63.64 | 13.64              | 50    | 36.36 |
|           | AM (N=62)                     | 1.61  | 4.84  | 11.29 | 9.68  | 35.48 | 37.1  | 51.61  | 48.39 | 6.45               | 20.97 | 72.58 |
|           | AP (N=16)                     | 0     | 25    | 0     | 25    | 12.5  | 37.5  | 87.5   | 12.5  | 25                 | 25    | 50    |
|           | PA (N=143)                    | 1.4   | 7.69  | 6.29  | 8.39  | 37.06 | 39.16 | 55.24  | 44.76 | 9.09               | 14.69 | 76.22 |
|           | RO (N=52)                     | 5.77  | 0     | 30.77 | 0     | 57.69 | 5.77  | 5.77   | 94.23 | 5.77               | 30.77 | 63.46 |
|           | RR (N=15)                     | 0     | 26.67 | 13.33 | 26.67 | 6.67  | 26.67 | 80     | 20    | 26.67              | 40    | 33.33 |
|           | TO (N=139)                    | 19.42 | 17.27 | 30.94 | 7.91  | 19.42 | 5.04  | 30.22  | 69.78 | 36.69              | 38.85 | 24.46 |
| Northeast | AL (N=101)                    | 39.6  | 0.99  | 34.65 | 2.97  | 21.78 | 0     | 3.96   | 96.04 | 40.59              | 37.62 | 21.78 |
|           | BA (N=415)                    | 2.65  | 31.33 | 3.37  | 19.52 | 6.51  | 36.63 | 87.47  | 12.53 | 33.98              | 22.89 | 43.13 |
|           | CE (N=184)                    | 11.41 | 0     | 44.57 | 3.26  | 40.22 | 0.54  | 3.8    | 96.2  | 11.41              | 47.83 | 40.76 |
|           | MA (N=217)                    | 1.84  | 42.4  | 7.37  | 23.5  | 5.53  | 19.35 | 85.25  | 14.75 | 44.24              | 30.88 | 24.88 |
|           | PB (N=223)                    | 39.01 | 34.53 | 11.66 | 10.76 | 2.69  | 1.35  | 46.64  | 53.36 | 73.54              | 22.42 | 4.04  |
|           | PE (N=185)                    | 10.81 | 8.65  | 32.43 | 4.86  | 37.3  | 5.95  | 19.46  | 80.54 | 19.46              | 37.3  | 43.24 |
|           | PI (N=221)                    | 47.06 | 5.88  | 33.94 | 3.17  | 8.6   | 1.36  | 10.41  | 89.59 | 52.94              | 37.1  | 9.95  |
|           | RN (N=166)                    | 19.28 | 36.75 | 16.27 | 19.88 | 3.01  | 4.82  | 61.45  | 38.55 | 56.02              | 36.14 | 7.83  |
|           | SE (N=75)                     | 17.33 | 10.67 | 36    | 8     | 21.33 | 6.67  | 25.33  | 74.67 | 28                 | 44    | 28    |
| MidWest   | GO (N=242)                    | 12.81 | 26.45 | 18.18 | 11.16 | 14.05 | 17.36 | 54.96  | 45.04 | 39.26              | 29.34 | 31.4  |
|           | MS (N=77)                     | 6.49  | 15.58 | 10.39 | 16.88 | 18.18 | 32.47 | 64.94  | 35.06 | 22.08              | 27.27 | 50.65 |
|           | MT (N=126)                    | 8.73  | 7.14  | 19.84 | 10.32 | 29.37 | 24.6  | 42.06  | 57.94 | 15.87              | 30.16 | 53.97 |
|           | DF (N=1)                      | 0     | 0     | 0     | 0     | 100   | 0     | 0      | 100   | 0                  | 0     | 100   |
| Southeast | ES (N=77)                     | 22.08 | 10.39 | 9.09  | 10.39 | 23.38 | 24.68 | 45.45  | 54.55 | 32.47              | 19.48 | 48.05 |
|           | MG (N=853)                    | 10.55 | 16.65 | 30.01 | 9.96  | 20.4  | 12.43 | 39.04  | 60.96 | 27.2               | 39.98 | 32.83 |
|           | RJ (N=91)                     | 12.09 | 10.99 | 9.89  | 7.69  | 39.56 | 19.78 | 38.46  | 61.54 | 23.08              | 17.58 | 59.34 |
|           | SP (N=645)                    | 7.91  | 11.63 | 5.12  | 4.96  | 21.71 | 48.68 | 65.27  | 34.73 | 19.53              | 10.08 | 70.39 |
| South     | PR (N=399)                    | 18.55 | 17.79 | 9.77  | 6.77  | 21.55 | 25.56 | 50.13  | 49.87 | 36.34              | 16.54 | 47.12 |
|           | RS (N=467)                    | 7.92  | 32.76 | 1.71  | 5.78  | 10.49 | 41.33 | 79.87  | 20.13 | 40.69              | 7.49  | 51.82 |
|           | SC (N=293)                    | 19.45 | 27.99 | 12.63 | 9.22  | 13.65 | 17.06 | 54.27  | 45.73 | 47.44              | 21.84 | 30.72 |
