# Supplementary material for: Transition to universal primary health care coverage in Brazil: Analysis of uptake and expansion patterns of Brazil’s Family Health Strategy (1998-2012)
Source: PubMed Central journal article supplement (PMC6086633; doi:10.1371/journal.pone.0201723), 2018-08-10
Supplement: pone.0201723.s003.pdf [file pone.0201723.s003.pdf]

**S2 Table. Descriptive statistics of municipal characteristics considering the type of FHS uptake, 2000 and 2010**

| Selected Indicators/Year                                      | Early Adopters (N=2,682) |             | Laggards (N=2,825) |             | Means test       |               |                |
|---------------------------------------------------------------|--------------------------|-------------|--------------------|-------------|------------------|---------------|----------------|
|                                                               | 2000                     | Mean        | Std. Dev.          | Mean        | Std. Dev.        | F-test        | p-value        |
| Population density                                            |                          | 128.84      | 685.15             | 59.22       | 239.39           | 24.81         | p<0.001        |
| Proportion of deaths with ill-defined cause                   |                          | 0.26        | 0.21               | 0.27        | 0.24             | 0.53          | 0.47           |
| GDP per capita (R\$)                                          |                          | 27126.60    | 32202.07           | 28263.00    | 33070.68         | 1.67          | 0.20           |
| Doctors per 1,000 inhabitants                                 |                          | 1.52        | 1.41               | 1.34        | 1.14             | 24.18         | p<0.001        |
| Gini index                                                    |                          | 0.55        | 0.07               | 0.54        | 0.07             | 44.35         | p<0.001        |
| Percentage of households without piped water and sewage       |                          | 13.74       | 14.94              | 13.87       | 16.32            | 0.09          | 0.77           |
| Infant mortality rate                                         |                          | 34.60       | 13.80              | 32.20       | 13.98            | 41.26         | p<0.001        |
| Illiterate rate (pop over 25 years old)                       |                          | 28.98       | 15.50              | 26.28       | 15.20            | 42.44         | p<0.001        |
| Percentage of individuals living in poverty                   |                          | 42.64       | 22.25              | 39.65       | 23.18            | 23.94         | p<0.001        |
| Private health insurance coverage (2004)                      |                          | 0.05        | 0.08               | 0.05        | 0.09             | 0.02          | 0.90           |
| Percentage of municipalities with less than 5,000 inhabitants |                          | 0.238       | 0.426              | 0.238       | 0.445            | 8.55          | p<0.001        |
|                                                               | <b>2010</b>              | <b>Mean</b> | <b>Std. Dev.</b>   | <b>Mean</b> | <b>Std. Dev.</b> | <b>F-test</b> | <b>p-value</b> |
| Population density                                            |                          | 149.70      | 775.07             | 69.25       | 288.85           | 25.53         | p<0.001        |
| Proportion of deaths with ill-defined cause                   |                          | 0.09        | 0.09               | 0.11        | 0.11             | 67.97         | p<0.001        |
| GDP per capita (R\$)                                          |                          | 35636.14    | 42824.91           | 38822.35    | 45108.33         | 7.23          | 0.01           |
| Doctors per 1,000 inhabitants                                 |                          | 2.18        | 2.04               | 2.09        | 1.81             | 3.35          | 0.07           |
| Gini index                                                    |                          | 0.50        | 0.06               | 0.49        | 0.07             | 28.51         | p<0.001        |
| Percentage of households without piped water and sewage       |                          | 9.03        | 11.78              | 9.47        | 13.84            | 1.62          | 0.20           |
| Infant mortality rate                                         |                          | 19.62       | 6.96               | 18.98       | 7.31             | 11.09         | p<0.001        |
| Illiterate rate (pop over 25 years old)                       |                          | 21.74       | 13.05              | 19.51       | 12.41            | 42.06         | p<0.001        |
| Percentage of individuals living in poverty                   |                          | 24.20       | 17.37              | 22.42       | 18.43            | 13.60         | p<0.001        |
| Private health insurance coverage                             |                          | 0.08        | 0.11               | 0.08        | 0.11             | 0.06          | 0.81           |
| Percentage of municipalities with less than 5,000 inhabitants |                          | 0.20        | 0.40               | 0.24        | 0.43             | 16.03         | p<0.001        |
