# Supplementary material for: Transition to universal primary health care coverage in Brazil: Analysis of uptake and expansion patterns of Brazil’s Family Health Strategy (1998-2012)
Source: PubMed Central journal article supplement (PMC6086633; doi:10.1371/journal.pone.0201723), 2018-08-10
Supplement: pone.0201723.s004.pdf [file pone.0201723.s004.pdf]

**S3 Table. Descriptive statistics of municipal characteristics considering the type of FHS coverage expansion, 2000 and 2010**

| Selected Indicators/Year                    | US (N=1,822) |           | UU (N=1,439) |           | Constrained (N=2,246) |           | Means test |           |         |
|---------------------------------------------|--------------|-----------|--------------|-----------|-----------------------|-----------|------------|-----------|---------|
|                                             | 2000         | Mean      | Std. Dev.    | Mean      | Std. Dev.             | Mean      | Std. Dev.  | Wald chi2 | p-value |
| Population density                          |              | 30.37     | 45.81        | 37.42     | 111.87                | 179.74    | 783.09     | 85.57     | p<0.001 |
| Proportion of deaths with ill-defined cause |              | 0.30      | 0.25         | 0.31      | 0.23                  | 0.21      | 0.19       | 268.81    | p<0.001 |
| GDP per capita (R\$)                        |              | 22,279.04 | 19,556.87    | 23,612.84 | 40,387.18             | 34,739.63 | 34,288.86  | 215.59    | p<0.001 |
| Doctors per 1,000 inhabitants               |              | 1.26      | 0.91         | 1.19      | 1.04                  | 1.71      | 1.59       | 165.88    | p<0.001 |
| Gini index                                  |              | 0.54      | 0.07         | 0.56      | 0.07                  | 0.55      | 0.07       | 83.13     | p<0.001 |
| % households without piped water and sewage |              | 14.12     | 15.01        | 16.07     | 15.41                 | 12.09     | 16.14      | 55.92     | p<0.001 |
| Infant mortality rate                       |              | 35.31     | 14.32        | 37.48     | 13.48                 | 29.15     | 12.75      | 411.26    | p<0.001 |
| Illiterate rate (pop over 25 years old)     |              | 30.49     | 15.39        | 32.67     | 14.73                 | 21.99     | 14.01      | 592.74    | p<0.001 |
| Percentage of individuals living in poverty |              | 45.17     | 21.44        | 48.67     | 21.20                 | 32.96     | 22.26      | 548.46    | p<0.001 |
| Private health insurance coverage (2004)    |              | 0.02      | 0.05         | 0.03      | 0.06                  | 0.08      | 0.11       | 553.86    | p<0.001 |
| % municipalities with < 5,000 inhabitants   |              | 42.43     | 49.44        | 24.95     | 43.29                 | 12.24     | 32.79      | 514.26    | p<0.001 |
| 2010                                        | Mean         | Std. Dev. | Mean         | Std. Dev. | Mean                  | Std. Dev. | Wald chi2  | p-value   |         |
| Population density                          |              | 32.98     | 56.53        | 42.55     | 126.61                | 211.84    | 891.83     | 95.75     | p<0.001 |
| Proportion of deaths with ill-defined cause |              | 0.09      | 0.10         | 0.11      | 0.11                  | 0.10      | 0.10       | 12.15     | p<0.001 |
| GDP per capita (R\$)                        |              | 32,451.62 | 38,820.55    | 32,133.81 | 50,573.69             | 44,471.00 | 42,515.60  | 107.32    | p<0.001 |
| Doctors per 1,000 inhabitants               |              | 1.74      | 1.36         | 1.63      | 1.27                  | 2.78      | 2.41       | 386.08    | p<0.001 |
| Gini index                                  |              | 0.48      | 0.06         | 0.50      | 0.06                  | 0.50      | 0.07       | 68.69     | p<0.001 |
| % households without piped water and sewage |              | 9.43      | 12.78        | 10.99     | 12.34                 | 8.00      | 13.16      | 48.99     | p<0.001 |
| Infant mortality rate                       |              | 20.37     | 7.81         | 20.93     | 6.97                  | 17.37     | 6.19       | 322.02    | p<0.001 |
| Illiterate rate (pop over 25 years old)     |              | 23.21     | 12.90        | 24.65     | 12.42                 | 15.87     | 11.32      | 612.70    | p<0.001 |
| Percentage of individuals living in poverty |              | 24.78     | 17.37        | 28.74     | 17.24                 | 18.58     | 17.65      | 317.03    | p<0.001 |
| Private health insurance coverage           |              | 0.04      | 0.07         | 0.05      | 0.08                  | 0.12      | 0.14       | 570.21    | p<0.001 |
| % municipalities with < 5,000 inhabitants   |              | 38.91     | 48.77        | 19.04     | 39.28                 | 10.11     | 30.15      | 488.50    | p<0.001 |
