# Supplementary material for: Transition to universal primary health care coverage in Brazil: Analysis of uptake and expansion patterns of Brazil’s Family Health Strategy (1998-2012)
Source: PubMed Central journal article supplement (PMC6086633; doi:10.1371/journal.pone.0201723), 2018-08-10
Supplement: pone.0201723.s005.pdf [file pone.0201723.s005.pdf]

**S4 Table. Descriptive statistics of municipal characteristics considering the categorization of the transition to universal primary health care coverage**

| Selected indicators/year                                   | EA-US (N=749) |           | EA-UU (N=915) |           | LG-US (N=1,073) |           | LG-UU (N=524) |           | EA-CT (N=1,018) |           | LG-CT (N=1,228) |           | Means Test |         |
|------------------------------------------------------------|---------------|-----------|---------------|-----------|-----------------|-----------|---------------|-----------|-----------------|-----------|-----------------|-----------|------------|---------|
|                                                            | Mean          | Std. Dev. | Mean          | Std. Dev. | Mean            | Std. Dev. | Mean          | Std. Dev. | Mean            | Std. Dev. | Mean            | Std. Dev. | Wald chi2  | p-value |
| Population density 2000                                    | 35.68         | 61.75     | 42.44         | 137.47    | 26.66           | 29.48     | 28.65         | 35.47     | 275.04          | 1,087.75  | 100.73          | 357.14    | 125.92     | p<0.001 |
| Population density 2010                                    | 39.79         | 78.48     | 48.82         | 155.48    | 28.23           | 32.79     | 31.61         | 40.48     | 321.25          | 1,228.77  | 121.15          | 430.83    | 139.73     | p<0.001 |
| Proportion of deaths with ill-defined cause 2000           | 0.30          | 0.24      | 0.30          | 0.22      | 0.30            | 0.25      | 0.34          | 0.25      | 0.21            | 0.18      | 0.21            | 0.20      | 274.95     | p<0.001 |
| Proportion of deaths with ill-defined cause 2010           | 0.08          | 0.08      | 0.10          | 0.10      | 0.11            | 0.11      | 0.12          | 0.12      | 0.09            | 0.08      | 0.11            | 0.10      | 101.60     | p<0.001 |
| GDP per capita 2000                                        | 21,638.19     | 20,601.99 | 23,594.69     | 39,609.82 | 22,726.39       | 18,789.76 | 23,644.53     | 41,748.27 | 34,339.28       | 30,429.55 | 35,071.53       | 37,194.91 | 219.85     | p<0.001 |
| GDP per capita 2010                                        | 31,400.00     | 48,174.07 | 31,070.76     | 45,009.38 | 33,185.69       | 30,648.92 | 33,990.09     | 59,047.71 | 42,856.37       | 34,971.04 | 45,809.51       | 47,850.20 | 114.31     | p<0.001 |
| Doctors per 1,000 inhabitants 2000                         | 1.38          | 0.97      | 1.26          | 1.15      | 1.18            | 0.84      | 1.07          | 0.78      | 1.84            | 1.78      | 1.61            | 1.41      | 225.56     | p<0.001 |
| Doctors per 1,000 inhabitants 2010                         | 1.75          | 1.33      | 1.64          | 1.32      | 1.74            | 1.39      | 1.60          | 1.19      | 2.99            | 2.65      | 2.60            | 2.18      | 389.65     | p<0.001 |
| Gini index 2000                                            | 0.54          | 0.07      | 0.56          | 0.07      | 0.53            | 0.07      | 0.55          | 0.07      | 0.56            | 0.06      | 0.54            | 0.07      | 130.48     | p<0.001 |
| Gini index 2010                                            | 0.49          | 0.06      | 0.50          | 0.06      | 0.48            | 0.64      | 0.50          | 0.06      | 0.51            | 0.06      | 0.49            | 0.07      | 102.61     | p<0.001 |
| % households without piped water and sewage 2000           | 13.12         | 14.00     | 15.60         | 14.71     | 14.80           | 15.64     | 16.88         | 16.55     | 12.51           | 15.65     | 11.73           | 16.54     | 62.67      | p<0.001 |
| % households without piped water and sewage 2010           | 8.33          | 11.06     | 10.60         | 11.88     | 10.21           | 13.82     | 11.67         | 13.09     | 8.13            | 12.07     | 7.89            | 14.00     | 60.24      | p<0.001 |
| Infant mortality rate 2000                                 | 36.25         | 14.12     | 37.66         | 13.41     | 34.66           | 14.42     | 37.18         | 13.61     | 30.64           | 12.96     | 27.92           | 12.43     | 452.45     | p<0.001 |
| Infant mortality rate 2010                                 | 20.84         | 7.85      | 20.73         | 6.61      | 20.04           | 7.77      | 21.26         | 7.54      | 17.72           | 6.10      | 17.08           | 6.25      | 331.41     | p<0.001 |
| Illiterate rate 2000 (pop > 25 years)                      | 32.12         | 15.41     | 33.23         | 14.76     | 29.36           | 15.27     | 31.69         | 14.64     | 22.84           | 14.21     | 21.28           | 13.80     | 621.32     | p<0.001 |
| Illiterate rate 2010 (pop > 25 years)                      | 24.61         | 13.17     | 25.17         | 12.58     | 22.24           | 12.61     | 23.73         | 12.09     | 16.53           | 11.62     | 32.06           | 11.03     | 640.98     | p<0.001 |
| Proportion of individuals living in poverty 2000           | 46.50         | 20.94     | 49.04         | 20.88     | 44.23           | 21.74     | 48.03         | 21.76     | 34.04           | 21.66     | 32.06           | 22.72     | 558.90     | p<0.001 |
| Proportion of individuals living in poverty 2010           | 25.36         | 16.73     | 28.84         | 16.87     | 24.38           | 17.80     | 28.57         | 17.87     | 19.18           | 16.96     | 18.09           | 18.18     | 320.23     | p<0.001 |
| Private health insurance coverage 2004                     | 0.03          | 0.05      | 0.03          | 0.05      | 0.02            | 0.45      | 0.03          | 0.07      | 0.09            | 0.11      | 0.08            | 0.11      | 564.01     | p<0.001 |
| Private health insurance coverage 2010                     | 0.04          | 0.07      | 0.05          | 0.08      | 0.04            | 0.07      | 0.05          | 0.08      | 0.12            | 0.13      | 0.12            | 0.14      | 575.41     | p<0.001 |
| Proportion of municipalities with < 5,000 inhabitants 2000 | 0.43          | 0.50      | 0.25          | 0.43      | 0.42            | 0.49      | 0.25          | 0.44      | 0.09            | 0.28      | 0.15            | 0.36      | 581.14     | p<0.001 |
| Proportion of municipalities with < 5,000 inhabitants 2010 | 0.38          | 0.49      | 0.19          | 0.39      | 0.40            | 0.49      | 0.19          | 0.39      | 0.07            | 0.25      | 0.13            | 0.33      | 549.25     | p<0.001 |
